# Supplementary material for: In Silico Structural Modeling and Analysis of Interactions of Tremellomycetes Cytochrome P450 Monooxygenases CYP51s with Substrates and Azoles
Source: MDPI journal article supplement (doi:10.3390/ijms22157811), 2021-07-22
Supplement: s1 [file s1]

# *In silico* Structural Modeling and Analysis of Interactions of *Tremellomycetes* Cytochrome P450 Monooxygenases CYP51s with Substrates and Azoles

Olufunmilayo Olukemi Akapo <sup>1,†</sup>, Joanna M. Macnar <sup>2,3,†</sup>, Justyna D. Kryś <sup>3</sup>, Puleng Rosinah Syed <sup>4</sup>, Khajamohiddin Syed <sup>1,\*</sup> and Dominik Gront <sup>3,\*</sup>

<sup>1</sup> Department of Biochemistry and Microbiology, Faculty of Science and Agriculture, University of Zululand, KwaDlangezwa 3886, South Africa; akapoolufunmilayo@gmail.com

<sup>2</sup> College of Inter-Faculty Individual Studies in Mathematics and Natural Sciences, University of Warsaw, Stefana Banacha 2C, 02-097 Warsaw, Poland; joanna.macnar@student.uw.edu.pl

<sup>3</sup> Biological and Chemical Research Center, Faculty of Chemistry, University of Warsaw, Pasteura 1, 02-093 Warsaw, Poland; juchxd@gmail.com

<sup>4</sup> Department of Pharmaceutical Chemistry, College of Health Sciences, University of KwaZulu-Natal, Durban 4000, South Africa; prosinah@gmail.com

\* Correspondence: khajamohiddinsyed@gmail.com (K.S.); dgront@gmail.com (D.G.)

† Authors contributed equally to the work.

## CYP51 sequences used in this study

>CYP51F (CNAG\_00040/Q09GQ2) *Cryptococcus neoformans* var. *grubii* H99

MSAII PQVQQLLGVAQFIPPWF AALPTSVKVVIAVIGIPALVICLNVFQQLCLPRRKDL  
PPVVFHYIPWFGSAAYYGEDPYKFLFECRDYGD LFTFILMGRRTVALGPKGNLSLGG  
KISQVSAEEAYTHLTPVFGKGVVYDCPNEMLMQKKFKISGLTTESLQSYPPMITSECE  
DFFTKEVGISPOKPSATLDLLKSMSELIILTASRTLQKKEVRESLNGQFAKYEDLDGGF  
TPLNFMFPNPLPSYKRRDEAQKAMSDFYLKIMENRRKGESDHEHDMIENLQSKYRNGV  
PLSDRDI AHIMIALLMAGQHTSSATSSWTLHLADRPDVVEALYQEQKQLGNPDGTFRD  
YKYEDLKELPIMDSIIRETLRMHAPIHSIYRKVLSDIPVPPSLAPSENGQYIIPKGHYI  
MAAPGVSQMDPRIWQDAKVNPARWHDEKGF AAAAMAQSKAEQVDYGFSGVSKGTESPY  
QPFAGGRHRCVGEQFAYTQLSTIFTYVVRNFTLKLAVPKFPETNYRTMIVQPNPLVTFT  
LRNAEVK

>CYP51F1 (1742) *Trichosporon asahii* var. *asahii* CBS 2479

MSIVQGAIEAALALPLAQKLA AVF IGLPVLAIVINLSQLLLPKDPTLPPVVFHVIPWFG  
SAAAYGMDPYKFLFDCREKYGDVFTFILLGRRMTVALGPKGNLSLGGKITHVSAEEAYT  
HLTPVFGKGVVYDCPNMLMQKKFSRSRVCCFCRSASGSPMPRSTPARTFRRNPTNAQ  
IKHGLTTEALSSYAELMRGETRQYFRDHVVTGKPFVLEMMQQLIILTASRTLQKKEVRE  
NLDIRFAKLEDLDKGFTPVNFLFPNLPLPSYKRRDKAQKEMSDFYMSIEKRRSGEHDH  
ENDMIAALQGSVYKNGVPLSDRDI SHIMIAILMAGSHTSSATSSWFLHLAYDQELQAL  
YDEQVQLFGNADGSFREMTELTRELPLMTACIRETLRLHAPIHSIYRKVMLDIAVPPSL  
AAPSKDGTYYIPKGHFIVAAPGVSQMDPRIWKDAKTWRPRRWLEEGGVANAANEEYTSGE

RV DYGF GAVSKGTESPYQPF GAGRHRCVGEQFAYLQLTMLVSEIIRTFKVEPGAPQFPET  
NYQTMIVLPLHGMIKLEPRK

>CYP51F (345805) *Naganishia vishniacii* v1.0

MSSSRILSLLPLEQLSWASIAAII LVGLPALLVVGNIIRQKVLPKDPSLPPVVFHLIPWF  
GSAATYGM DPYKFLFDCREQYGD LFTFVLLGRKMTVALGPKGNNLILGGRLNQVSAAEAY  
THL TTPVFGEGVVYDCSNDLLMQQKRMVKFGLSTENRAYVGMITEETLGFLTNELKASP  
TAWQGF DALNAMELTIL TASRTLQGKEVRAGLDKTF AERYEHL DGGFTP INFMFPNLPL  
PSYRRDKAQKAMSEFYQGIIRKRREGTHDHEYDMI SALQSSKYKDGTPLSDDRIAHHMI  
ALLMAGQHTSSATSSWTLHLAERTDIWEELYREQNKFGNPDGTFRDLTYEELKELPVL  
DHVIRETLRLHAPIHSIMRKVISDIPVNTLSSPKQHENATYVIPKGHFVLASPGVAQMD  
PLIWQNAEEWNPWRWDESGVAAMAAEQYTEGDKVDYGYGSVSKGTESPYQPF GAGRHRC  
IGESFAYVQLQTILATLCRRVVLKLEGPFPAPNYQTMIVLPLKGQTKIMYKLRA

>CYP51F (367271) *Cryptococcus curvatus*

MAMDPSAVLDWAHALPLPVKIVGAVIGVPLLIVLNVLRQLIVPTDPTAPPVVFHYIPWF  
GSAAYYGM DPYKFMFECDKYGDVFTFILLGRRMTVALGPKGNNLSLGGKVSHVSAEDAY  
THL TTPVFGKGVVYDCPN DMLMQQKFIKHGLTTEALQSYASLMPAECHGYFNNEKIK  
ANPGPKTVDVLHVMAELIVLTASRTLQGKEVRENMSIRFAKILLEDLDKGFTPLNFMFPNL  
PLPSYRRDLAQKMSDFYMSIMAKRRRTGEHDEPDMIQALQGSVYRNGTPLSDRDIAHM  
MIALTMAGQHTSSATSSWFLHLAHDQDIQKRLYEEQVEYFGNPDGTFRPMTYEDTKKLP  
LMDSCIRETLRLHAPIHSIYRKVLQPIVVPQSLAAPSEDKAYVIPKGNFIVAAPGVSQMD  
PKIWDDAPRWNPRLWLDGGIAKTANEYQAGEKVDYGF GAVSKGTESPYQPF GAGRHRC  
IGEQFAYLQLTLVVG EVVRNYKLTAAQREFPKTNYQTMIVLPLDPKITFEARV

>CYP51F1 (38441) *Tremella mesenterica* Fries v1.0

MSLSIASVPWAPQWLLSLPSLLVLLGII GFPTLIIFLNVFRQLVLRDKNLPPVVFHYI  
PWF GSAAYYGEDPYKFYFECREKYGDVFTFVLLGRNITVALGPKGNNLSLGGKTTQVSAE  
EAYKHV TTPVFGKGVVYDCPN EMLMQQKFIKNGLSTEALASYPPLINAECEHYFEKELG  
FSPTSPGPKTIEVFKIMSQILILSASRTLQGKEVRESLDSKFAEYFHDLDGGFTPLNFMF  
PNLPLPSYRKRDKAQKSMSDFYLNIMQKRREGATDVNGSFDMLAALQGCVYRNGVPLTDR  
DIAHMMIAILMAGQHTSSATSSWALLHLAHRPDVADALYEEQKTLFGNPDGSFRPVEYGD  
EKRM TLMNSIIRETLRIHAPIHSIYRKVISMPVPASLSAPSESATYIIPKNYYIVAAPG  
VSAMDPRIWKDANVWEPFRWSDEKGTAAAMALNEYTTGGEKMDYGFQQVSKGTESPYQPF G  
AGRHRCVGEAFAYVQLSVIIAYIIRNYSRLRLETPDGLFPKTNRYRTMIVLPLNGLMSLTKR  
KQEV

>CYP51F1 (523016) *Naematella encephala* UCDFST 68-887.2 v1.0

MTVALGPKGNLSLGGKVSQVSAEDAYTHLTPVFGKGVVYDCPNLLMQQKFIKHGLT  
TEALSSYAPLMYKEATDFFEHELGLTPATPGPKLEALKIMSELIILTAGRSLQGKEVRA  
SLNARFASLYEDLGGFTPLNFMFPNLPLSYRRDRQAQKEMSDFYLDIRKRREGETEP  
EHDMISVLSGCVYRDGTPLTDRDVSHMMIAILMAGQHTSSATSSWILLHLAHRPDVVEAL  
YEEQKFLFGNQDGTREVYESTKQMTLMEAIIRETLRLHAPIHSIYRKVLSDIPVPASL  
SSPSESSAYVIEGHHFIVAAPGVSQMDPLIWPDAKTWNPYRWLDEKGVAASAKEQYSGAT  
SEQVDYGFQVSKGTESPYQPFAGRHR

>CYP51F1(627561)Kockovaeella imperatae NRRL Y-17943 v1.0

MDVFNNPFVANMMNTGRGFNRQPTAQREFARNFREGKIQPIDPTIPLYILSSIAILLF  
TVVGSNLMQQLAPRDPSPVVLHYFPWFSGAYSYGDPYKFLFKCRAKYGDVFTFIMF  
GRKMTVALGPKGNLSLGGKVSQVSAEDAYTHLTPVFGKGVVYDCPNELMQQKFIKH  
GLTPQAFQTYAPLIWQETHQFFEQKGFNVYPGPKSYEAIKFFSELIILTASRTLQGKEV  
RAGLTSSAAKHFEHLDKGFTPINFLFPNLPLPSYRKDKAQKAMSDFYLEIMRKREGES  
DVDEHDMIAALTGNEYKDGTPLTDRDVHMMIAILMAGQHTSSATSSWTLHLAQKPLIF  
KALFEEHDLFQNEGDGTWEDVTYESTKEMPLMAAVIRETLRMHAPIHSIYRKVLQDLEVP  
PALAAGNGSRPYVPKGHFVVAAPGVSAMDPKVWPDADKWDPFRWLEDKGMAQEALDSY  
SGATSEQIDYGFQVSKGTESPYMPFAGRHRVCGEQFAYLQLSVIMSYIVRNYDIQLLG  
AFPQNTNYNTMIVLPLNGYVTFKKRGQSKWILSTK

>CYP51F(629036)Cryptococcus werrinae

MRLSTCLAVATAIVAPAKAIQHVPVSVLLPSPDASPSTVKAPTLGDGEAFDVFANHFGV  
GSQSTFEKYQKKSWAHLVDPSHSELGEEQAKVILIQGDLSPSDILPPTYQDSLADFEL  
PSFSPSYETMNFLOPFMIRGQKVVGHVLENGQDLEEGFDRVWSNVKGSQVGGKMASAFDL  
NTSLHAQALHAELQALSALAMNLPVDARLERNRVWDSVVISLGTNDSTGVDAEVREMG  
LNVIRASLQALANPKQPRVVLVVPTTSGAAFAPYVAVKKFFTRLTSSDQSILLGFL  
PTLFSSFGTIGSVLLLLSLPVLLVAGNVFRQKVLPRDPTLPPLVFHYIPWFGSAATYGM  
DPYKFLFDCREQYGDFTFILLGRKMTVALGPKGNLILGGKLSQVSAEDAYTHLTPVFG  
KGVVYDCPNELMQQKRMVKFGLSTENFRVYVPLIKQETLDFLGKDLKPSNEWKGFNAL  
HAMAELTILTASATLQGKEVRGKLDKTFKRYEALDGGFTPINFMFPNLPLPSYKRRDKA  
QAEMSEFYQSIIRGRREGASEHDMIAALMASTYRDGTPLSDSIAHMMIALLMAGQHT  
SSATSSWTLHLADRTDVYAELYEEQKEKFGNPDGTFRDMTYEDLKDLPKLDVIRETLR  
MHAPIHSIMRKVMTDMPVPNALAAPTANEKSSYIVPKGHFVLASPGVAQMDPLIWDASI  
WNPWRWTDEKGMASQALEEYTSQDKVDYGYGSVSKGTESPYQPFAGRHRICGETFAYLQ  
LQTIATFIRNVEMKLDGPFKNTYQTMVVLPLPGTKILYRNK

>CYP51F1(809380)(Cryptococcus terricola)

MDPYKFMFGCRAKYGDLFTFILMGREMTVALGPKGNLILGGKLSQVSAAEAYTHLTPV  
FGKGVVYDCPNMLMQQKRMVKFGLSTENLKSYPVKITRETLDFLSHGLHSATKWQSFN  
ALDKLAELITLTASDCLQGREVRAGLDKTFAKRIEALDKGFTPMNFVFPNLPLPAYWNRD  
KAQKEMSEFYQEIRKRREGTHDHEHDMLEALMGSSYKNGTPLTSDIAHMMIALLMAGQ  
HTSSATSSWTLHLAQRHDIYEALYQEKEKFGNADGTFRDLTYEDLKDLPLLDSCIRET  
LRLHAPLHSMRKVISDIPVPNSLSSPSQTNDASYVIPKGHFLMACPGVSQMDPLIWQDS  
TTWNPYRWSDERGVAAQAVEEYQGEKGEKVDYGFSGSVSKGTESPYQPFAGRHRICIGESF  
AYVQLQTIATVVRNLTLKFEGDFPSPNYQTMVVLPKGGEILFKSRQ

>CYP51F (KIR77383.1/E6QZS1) *Cryptococcus gattii* EJB2

MSAIIPQVQQLLGQLAQYIPWFTALPTSLKIVIAVIGIPAFIIGLNVFQQLCLPRTKDL  
PPVVFHYIPWFGSAAYYGEDPYKFLFECRDKYGDLFTFILMGRRITVALGPKGNLSLGG  
KISQVSAAEAYTHLTPVFGKGVVYDCPNMLMQQKFKISGLTTESLQSYPMITSECE  
DFFTKEVGISSQKPSATLDLLKMSSELIILTASRTLQGKEVRESLNGQFAKYEDLDGGF  
TPLNFMFPNLPLPSYRRRDEAQKMSDFYLIKIMENRRKGESDHEHDMIENLQGCKYRNGV  
PLSDRDVAHIMIALLMAGQHTSSATSSWTLHLADRPDIVEALYQEKEKLGNDPGTFRD  
YKYEDLKELPIMDSIIRETLRMHAPIHSIYRKVLSDIPVPPSLAAPSENGQYIIPKGHYI  
MAAPGVSQMDPRIWQDAKVVNPARWHDEKGFAAAAMAQYTKAEQVDYGFSGSVSKGTESPY  
QPFAGRHRVCGEQFAYTQLSTIFTYVVRNFTLKLAVPKFPETNYRTMIVQPTNPLVTFT  
LRNAEVKQEV

>EAL23379

QVQQLLGQVAQFFPPWFAALPTSLKVAIAVVGIPALIIGLNVFQQLCLPRRKDLPPVVFHYIPWFGSAAYYGEDPYKFLF  
ECRDKYGDLFTFILMGRRITVALGPKGNLSLGGKISQVSAAEAYTHLTPVFGKGVVYDCPNMLMQQKFKISGLTTE  
SLQSYPMITSECEDFFTKEVGISQKPSATLDLLKAMSELIILTASRTLQGKEVRESLNGQFAKYEDLDGGFTPLNFM  
FPNLPLPSYRRRDEAQKMSDFYLIKIMENRRKGESDHEHDMIENLQSCYRNGVPLSDRDIHIMIALLMAGQHTSSATS  
SWTLHLADRPDVVEALYQEKGKLGNDPGTFRDYEDLKELPIMDSIIRETLRMHAPIHSIYRKVLSDIPVPPSLAP  
SENGQYIIPKGHYI MAAPGVSQMDPRIWQDAKVVNPARWHDEKGFAAAAMVQYTKAEQVDYGFSGSVSKGTESPYQPFAG  
RHRVCGEQFAYTQLSTIFTYVVRNFTLKLAVPKFPETNYRTMIVQPNPLVTFTLRNAEVKQEV

## CYP51-ligand groups

- **Models with clashes**

There is a small but noticeable number of clashing conformations observed for many CYP51F-ligand conformations, most likely artifacts of the modelling process. Its fraction ranges from nearly 0% (1 model in 120 000) for clotrimazole to 0.15% for itraconazole. Interestingly,

eburicol, lanosterol and obtusifoliosol metabolites recorded a significantly higher fraction of incorrect conformations, above the average. These models could, in general, be easily excluded on an early stage of analysis, either by a filtering protocol in Rosetta itself, or by a BioShell script. Here we report them only to draw the complete analysis.

- **Correct conformations**

In this semi-global docking scenario as we applied in our study, ligands explored nearly the whole surface of a protein. The chance of finding a correct solution is therefore relatively low. Here we observe from 14 correct solutions for ketoconazole to 212 correct solutions for lanosterol - from 0.012% to 0.18% of all models generated for a given ligand. The dependence of these statistics on a protein is considerably weaker than on a ligand. The number of correct solutions ranges from 51 for KIR77383 to 143 cases for 523016 ortholog.

- **Nearly-correct conformations**

The 1 Å range of  $d_{\text{NFe}}$  distance we assumed to define correct solutions is pretty tight. For more generous 2 Å criterion a large fraction of ligand molecules are located correctly in the active site even though their interaction with an iron atom is not that close. Given such an extended criterion of success, for all 108 combinations “nearly-correct” solutions were found.

- **In the pocket conformations**

The fourth group consists of models where a small molecule agent still resides in the active pocket, but is quite far from the heme cofactor. Orientation of a ligand is very diverse in these models and often different from what might be expected from experimental data. Total energy for models in this group is comparable to the values observed for “correct”, and “nearly-correct” models. The main reason for this is because Rosetta is unaware of the specificity of the system we study. None of the two energy functions that was used by Rosetta modelling software: “soft” for docking and “hard-rep” for final scoring, contain a term that would explicitly assess interactions between a ligand and a heme cofactor, besides standard Van der Waals and Coulomb interactions. Most notably, there is no potential to mimic a semi covalent bond that is formed between a heme iron atom and an azole nitrogen. This interaction has significant contribution to the total energy of a complex. Including this effect in the modelling protocol would certainly favor the correct geometry. In the majority of models therefore an inhibitor is further away from heme than 8 Å and doesn’t count to any of the four considered categories.

**Table S1.** Summary statistics of CYP51s from *Tremellomycetes* alignments with CYP51 from *Saccharomyces cerevisiae* (PDB code: 4LXJ)<sup>1</sup>.

| <b>CYP51 name</b>        | <b>Protein ID</b> | <b>Number of Amino acids in CYP51</b> | <b>Number of amino acids aligned with 4LXJ</b> | <b>E-value</b> | <b>Identities</b> | <b>Similarity</b> |
|--------------------------|-------------------|---------------------------------------|------------------------------------------------|----------------|-------------------|-------------------|
| CYP51F CngH99            | 00040             | 549                                   | 523                                            | 7.4E-67        | 43.0%             | 78.6%             |
| CYP51F1 TaaCBS2479       | 1742              | 562                                   | 507                                            | 3.5E-63        | 44.0%             | 76%               |
| CYP51F1 Nvis             | 345805            | 536                                   | 514                                            | 4.7E-67        | 44.0%             | 78.2%             |
| CYP51F Ccur              | 367271            | 535                                   | 512                                            | 6.5E-65        | 44.0%             | 78.5%             |
| CYP51F1 Tmfri            | 38441             | 540                                   | 514                                            | 1.9E-65        | 41.0%             | 74.3%             |
| CYP51F1 Nen UCDFST68-887 | 523016            | 390                                   | 364                                            | 3.8E-50        | 50.0%             | 89.3%             |
| CYP51F1 Kim NRRL Y-17943 | 627561            | 548                                   | 525                                            | 7.5E-63        | 41.0%             | 75.7%             |
| CYP51F Cwer              | 629036            | 533                                   | 516                                            | 1.6E-55        | 45.0%             | 80.3%             |
| CYP51F Cter              | 809380            | 468                                   | 445                                            | 7.7E-62        | 46.0%             | 84.3%             |
| CYP51F1 Cneo B-3501A     | EAL23379          | 546                                   | 524                                            | 2.00E-66       | 41.0%             | 76.8%             |
| CYP51F Cgat EJB2         | KIR77383          | 549                                   | 523                                            | 1.5E-66        | 42.0%             | 78.3%             |



**Table S2. Analysis of active site cavity amino acids in *Tremellomycetes* CYP51s.** CYP51s represented with their protein IDs. The nature of active site cavity amino acid composition was calculated at the webserver <https://www.peptide2.com/> using the Peptide Hydrophobicity/Hydrophilicity Analysis tool. Hydrogen bonds, stacking interactions and Van der Waals interactions are marked in blue, green and black font, respectively.

| CYP51F | Active site cavity amino acids                                                                                                                                                                                                                                               | No. of Amino acids in cavity | Cavity volume [Å <sup>3</sup> ] | Nature of active site                                                   | Amino acids interacting with ligands                                               |                                                                                     |                                                                                                                                            |                                                                                                                   |                                                                                                                   |                                                                                                        |                                                                                        |                                                                                                                     |                                                                              |
|--------|------------------------------------------------------------------------------------------------------------------------------------------------------------------------------------------------------------------------------------------------------------------------------|------------------------------|---------------------------------|-------------------------------------------------------------------------|------------------------------------------------------------------------------------|-------------------------------------------------------------------------------------|--------------------------------------------------------------------------------------------------------------------------------------------|-------------------------------------------------------------------------------------------------------------------|-------------------------------------------------------------------------------------------------------------------|--------------------------------------------------------------------------------------------------------|----------------------------------------------------------------------------------------|---------------------------------------------------------------------------------------------------------------------|------------------------------------------------------------------------------|
|        |                                                                                                                                                                                                                                                                              |                              |                                 |                                                                         | Clotrimazole                                                                       | Eburicol                                                                            | Fluconazole                                                                                                                                | Itraconazole                                                                                                      | Ketoconazole                                                                                                      | Lanosterol                                                                                             | Obtusifoliol                                                                           | VT-1129                                                                                                             | Voriconazole                                                                 |
| 00040  | F71 S73<br>A74<br>A75<br>Y76<br>Y77<br>G78<br>E79<br>D80 P81<br>L100<br>M101<br>R103<br>L118<br>A127<br>A130<br>Y131<br>L134<br>T135<br>F139<br>V143<br>V144<br>Y145<br>M151<br>L152<br>M153<br>Q155<br>K156<br>K157<br>I159<br>K160<br>L163<br>A212<br>L216<br>F240<br>T241 | 99                           | 1518                            | Hydrophobic: 54.55%<br>Acidic: 3.03%<br>Basic: 12.12%<br>Neutral: 30.3% | Y131 HEM1<br>F139 F240<br>Y145<br>T135 T321<br>M316 M528<br>A313 I386<br>A317 V144 | Y131<br>Y145<br>I389<br>A317<br>F240<br>V144<br>I386<br>A313<br>HEM<br>F139<br>T321 | W445 HEM<br>Y480 F483<br>Q481 R377<br>A384 F245<br>Y145 A457<br>L380 R381<br>M528 A317<br>Y131 Q428<br>T321 W445<br>P482 E448<br>I386 P385 | Y390 F240<br>F245 H387<br>Y131<br>P242 L100<br>Y390 HEM<br>Y77 V144<br>I386 T321<br>F139 M528<br>G78 A317<br>T527 | Y390 F240<br>F245 H387<br>Y131<br>P242 L100<br>Y390 HEM<br>Y77 V144<br>I386 T321<br>F139 M528<br>G78 A317<br>T527 | M528<br>A324 S322<br>F240 A317<br>L380 P385<br>V144 T325<br>I386 Y145<br>Y131 HEM<br>H320 T321<br>T135 | L134 A130<br>H133 F240<br>A317 F245<br>T321 M528<br>Y131 L100<br>Y390 HEM<br>I386 Y145 | Y131<br>F139<br>H320<br>F240<br>Y145<br>Q319<br>Y131<br>M316<br>T321<br>HEM<br>I386<br>D237<br>A317<br>Y233<br>M528 | I386<br>Y131 Y145<br>HEM F240<br>P385 T135<br>A317 G318<br>T321 I386<br>M528 |



[illegible]



|  |                                                                                                                                                                                                                                                                                                                                                                                               |  |  |                                    |                                                                                                     |                                                                                                                                  |                                                               |                                                                                                                                                                              |                                                                                                     |                                                                                                         |                                                                                                      |                                                                                                                  |                                                                                             |
|--|-----------------------------------------------------------------------------------------------------------------------------------------------------------------------------------------------------------------------------------------------------------------------------------------------------------------------------------------------------------------------------------------------|--|--|------------------------------------|-----------------------------------------------------------------------------------------------------|----------------------------------------------------------------------------------------------------------------------------------|---------------------------------------------------------------|------------------------------------------------------------------------------------------------------------------------------------------------------------------------------|-----------------------------------------------------------------------------------------------------|---------------------------------------------------------------------------------------------------------|------------------------------------------------------------------------------------------------------|------------------------------------------------------------------------------------------------------------------|---------------------------------------------------------------------------------------------|
|  | Y66<br>G67<br>M68<br>D69 P70<br>F87 L89<br>L90<br>M94<br>L107<br>A116<br>A119<br>Y120<br>L123<br>T124<br>F128<br>V133<br>Y134<br>N138<br>L141<br>M142<br>Q144<br>K145<br>V148<br>L152<br>T196<br>A200<br>L204<br>F228<br>T229<br>P230<br>I231<br>N232<br>F233<br>M234<br>F235<br>M275<br>M298<br>I300<br>A301<br>L302<br>L303<br>M304<br>A305<br>G306<br>Q307<br>H308<br>T309<br>S310<br>S311 |  |  | Basic: 8.16%<br>Neutral:<br>33.67% | HEM1 Y120<br>F228 F128<br>H308<br><br>V133 M304<br>T309 HEM1<br>I374 V519<br>A301 Y134<br>A305 I518 | F228<br>Y120<br><br>Y120<br>T124<br>P373<br>S310<br>L123<br>HEM1<br>Y134<br>F228<br>A305<br>I374<br>F128<br>M304<br>T309<br>I377 | A301 F128<br>T309 F228<br>V133 I518<br>Y120 Y134<br>A305 HEM1 | Y134 F128<br>HEM1<br><br>L123 L140<br>F228 V133<br>Q143 P289<br>V132 C136<br>L141 Q144<br>T288 M147<br>I518 K285<br>T309 L290<br>M298 Y284<br>K145 A305<br>K283 Y134<br>I374 | F128 H308<br>F228<br><br>S193 Q307<br>D225 L123<br>A305 HEM1<br>Y221 T309<br>Y120 M304<br>T124 I197 | H308<br>S310 T309<br>F228 Y120<br>A305 F485<br>V519 T196<br>Q489 Y134<br>Q307 L303<br>I374 G306<br>HEM1 | Q307 Y134<br>A305 G306<br>L302 Y120<br>L123 I374<br>HEM1 F128<br>F228 T124<br>M304 L303<br>L204 T309 | Y120<br>F233<br>Y134<br>F128<br>F228<br><br>I518<br>M517<br>HEM1<br>I374<br>T309<br>T124<br>A305<br>M378<br>P230 | F473 Y487<br>Y470 HEM1<br><br>I481 C480<br>A442 V441<br>L368 P472<br>F485 F473<br>S484 G482 |
|--|-----------------------------------------------------------------------------------------------------------------------------------------------------------------------------------------------------------------------------------------------------------------------------------------------------------------------------------------------------------------------------------------------|--|--|------------------------------------|-----------------------------------------------------------------------------------------------------|----------------------------------------------------------------------------------------------------------------------------------|---------------------------------------------------------------|------------------------------------------------------------------------------------------------------------------------------------------------------------------------------|-----------------------------------------------------------------------------------------------------|---------------------------------------------------------------------------------------------------------|------------------------------------------------------------------------------------------------------|------------------------------------------------------------------------------------------------------------------|---------------------------------------------------------------------------------------------|

|        |                                                                                                                                                                                                                                                                                                                                                              |     |      |                                                          |  |  |  |  |  |           |  |      |              |  |
|--------|--------------------------------------------------------------------------------------------------------------------------------------------------------------------------------------------------------------------------------------------------------------------------------------------------------------------------------------------------------------|-----|------|----------------------------------------------------------|--|--|--|--|--|-----------|--|------|--------------|--|
|        | T313<br>I364<br>L368<br>H371<br>A372<br>P373<br>I374<br>H375<br>S376<br>I377<br>M378<br>R379<br>L411<br>P414<br>G415<br>Q418<br>V441<br>Y470<br>Q471<br>P472<br>F473<br>G474<br>A475<br>G476<br>R477<br>H478<br>R479<br>C480<br>I481<br>G482<br>E483<br>S484<br>F485<br>A486<br>Y487<br>Q489<br>L490<br>Y514<br>Q515<br>T516<br>M517<br>I518<br>V519<br>L520 |     |      |                                                          |  |  |  |  |  |           |  |      |              |  |
| 367271 | F60 S62<br>A63<br>A64<br>Y65                                                                                                                                                                                                                                                                                                                                 | 115 | 1873 | Hydrophobic:<br>52.17%<br>Acidic: 1.74%<br>Basic: 12.17% |  |  |  |  |  | HEM1 H310 |  | T311 | H377<br>Y380 |  |

|                                                                                                                                                                                                                                                                                                                                                                                               |  |  |                    |                                                                                   |                                                                                                                                  |                                                          |                                                                                                                                                                                  |                                                                                                              |                                                                                                    |                                                                                        |                                                                                                                          |                                                                                        |
|-----------------------------------------------------------------------------------------------------------------------------------------------------------------------------------------------------------------------------------------------------------------------------------------------------------------------------------------------------------------------------------------------|--|--|--------------------|-----------------------------------------------------------------------------------|----------------------------------------------------------------------------------------------------------------------------------|----------------------------------------------------------|----------------------------------------------------------------------------------------------------------------------------------------------------------------------------------|--------------------------------------------------------------------------------------------------------------|----------------------------------------------------------------------------------------------------|----------------------------------------------------------------------------------------|--------------------------------------------------------------------------------------------------------------------------|----------------------------------------------------------------------------------------|
| Y66<br>G67<br>M68<br>P70 F87<br>L89 L90<br>R92<br>M94<br>L107<br>A116<br>A119<br>Y120<br>L123<br>T124<br>F128<br>V132<br>V133<br>Y134<br>M140<br>L141<br>M142<br>Q143<br>Q144<br>K145<br>K146<br>F147<br>I148<br>K149<br>H150<br>G151<br>L152<br>I198<br>A202<br>L206<br>F230<br>T231<br>P232<br>L233<br>N234<br>F235<br>M236<br>F237<br>M277<br>H299<br>M300<br>M301<br>I302<br>A303<br>L304 |  |  | Neutral:<br>33.91% | Y134 F128<br>HEM1 F230<br>Y120<br><br>A303 A307<br>M518 I376<br>M306 H310<br>T311 | Y134<br>Y120<br><br>Y120<br>A119<br>A116<br>D118<br>E117<br>T124<br>M518<br>I376<br>HEM1<br>Y134<br>T311<br>T121<br>A307<br>F230 | L123 Y120<br>A307 HEM1<br>I376 M518<br>T311 F230<br>T517 | Y66 Y380<br>F87 HEM1<br>H377<br><br>P414 M518<br>P375 S378<br>F230 M74<br>F85 T124<br>V96 I376<br>A412 F73<br>I379 Y66<br>C77 V411<br>A413 F128<br>L123 A307<br>T311 L98<br>V416 | M306 G308<br>T517 S312<br>T201 T311<br>L206 F230<br>M518 Q309<br>I376 HEM1<br>A307 Q489<br>A202 I198<br>Y120 | G308<br>F128 T311<br>A307 F230<br>Y134 V133<br>A303 H310<br>I376 M518<br>T124<br>HEM1<br>Y120 P375 | P375 Y134<br>I376 A307<br>M518 F230<br>A119 F235<br>Y120 L123<br>H122 T311<br>R92 HEM1 | F235<br>F128<br>H310<br>F230<br><br>A307<br>L123<br>M518<br>HEM1<br>P232<br>T124<br>I376<br>M306<br>T311<br>V127<br>T517 | F230 HEM1<br>Y134 F128<br>Y120<br><br>T311 M518<br>F230 A307<br>A116 T124<br>I376 R381 |
|-----------------------------------------------------------------------------------------------------------------------------------------------------------------------------------------------------------------------------------------------------------------------------------------------------------------------------------------------------------------------------------------------|--|--|--------------------|-----------------------------------------------------------------------------------|----------------------------------------------------------------------------------------------------------------------------------|----------------------------------------------------------|----------------------------------------------------------------------------------------------------------------------------------------------------------------------------------|--------------------------------------------------------------------------------------------------------------|----------------------------------------------------------------------------------------------------|----------------------------------------------------------------------------------------|--------------------------------------------------------------------------------------------------------------------------|----------------------------------------------------------------------------------------|

[illegible]

|       |                                                                                                                                                                                                                                                                                                    |     |      |                                                                                |                                                                                                |                                                                                                                                                          |                                                                  |                                                                                                     |                                                                                             |                                                                                                         |                                                                                                                   |                                                                                                                                                                  |                                                                                        |
|-------|----------------------------------------------------------------------------------------------------------------------------------------------------------------------------------------------------------------------------------------------------------------------------------------------------|-----|------|--------------------------------------------------------------------------------|------------------------------------------------------------------------------------------------|----------------------------------------------------------------------------------------------------------------------------------------------------------|------------------------------------------------------------------|-----------------------------------------------------------------------------------------------------|---------------------------------------------------------------------------------------------|---------------------------------------------------------------------------------------------------------|-------------------------------------------------------------------------------------------------------------------|------------------------------------------------------------------------------------------------------------------------------------------------------------------|----------------------------------------------------------------------------------------|
|       | F485<br>A486<br>Y487<br>L488<br>Q489<br>L490<br>N514<br>Y515<br>Q516<br>T517<br>M518<br>I519                                                                                                                                                                                                       |     |      |                                                                                |                                                                                                |                                                                                                                                                          |                                                                  |                                                                                                     |                                                                                             |                                                                                                         |                                                                                                                   |                                                                                                                                                                  |                                                                                        |
| 38441 | F58 S60<br>A61<br>A62<br>Y63<br>Y64<br>G65<br>E66<br>D67 P68<br>L87 L88<br>R90 I92<br>N101<br>L105<br>A114<br>A117<br>Y118<br>K119<br>V121<br>T122<br>F126<br>V130<br>V131<br>Y132<br>N136<br>L139<br>M140<br>Q142<br>K143<br>I146<br>K147<br>G149<br>L150<br>I196<br>S199<br>A200<br>S201<br>T203 | 107 | 1762 | Hydrophobic:<br>50.47%<br>Acidic: 3.74%<br>Basic: 11.21%<br>Neutral:<br>34.58% | F126 Y118<br>H310 HEM1<br>F228<br><br>V131 A307<br>Y132 F126<br>T311 M306<br>I522 A303<br>I376 | Y118<br>F228<br>F126<br><br>F233<br>T122<br>I522<br>V121<br>I376<br>Y132<br>H310<br>P230<br>HEM1<br>M306<br>T311<br>A307<br>V125<br>T229<br>M521<br>G227 | HEM1<br>Y118 F126<br>T311 M521<br>A307 T122<br>F228 I376<br>Y132 | H310 H222<br>F228<br><br>Y118 T520<br>A307 D225<br>M521 I522<br>V131 HEM1<br>L524 I376<br>Y132 T311 | F228 H310<br><br>HEM1 I376<br>V131 T122<br>F126 M521<br>Y132 M306<br>D225 Q309<br>A307 L524 | G308<br>F126 A307<br>S312 Y118<br>Q309 I376<br>I522 P375<br>V131 F228<br>T122 Y132<br>I196 T311<br>HEM1 | F228 H377<br>G308 S378<br>Y380 F233<br>Y132 P230<br>A307 M306<br>T311 A303<br>F126 I376<br>Y118 HEM1<br>M521 I379 | E115<br>A114<br>Y118<br>F126<br>Y132<br>H479<br><br>S113<br>Y118<br>A307<br>L139<br>HEM1<br>T109<br>R381<br>E115<br>N136<br>A303<br>V131<br>I376<br>R478<br>T311 | A307<br>Y132 Y118<br>HEM1 F126<br><br>G308 I376<br>R381 A307<br>A303 F228<br>T311 Y132 |

[illegible]



|        |                                                                                                                                                                                                                                            |     |      |                                                                                |                                                                                     |                                                                                                              |                                                                       |                                                                                                                          |                                                             |                                                                                                             |                                                                                             |                                                                                       |                                                               |
|--------|--------------------------------------------------------------------------------------------------------------------------------------------------------------------------------------------------------------------------------------------|-----|------|--------------------------------------------------------------------------------|-------------------------------------------------------------------------------------|--------------------------------------------------------------------------------------------------------------|-----------------------------------------------------------------------|--------------------------------------------------------------------------------------------------------------------------|-------------------------------------------------------------|-------------------------------------------------------------------------------------------------------------|---------------------------------------------------------------------------------------------|---------------------------------------------------------------------------------------|---------------------------------------------------------------|
|        | H479<br>R480<br>C481<br>V482<br>G483<br>E484<br>A485<br>F486<br>A487<br>Y488<br>Q490<br>L491<br>N517<br>Y518<br>R519<br>T520<br>M521<br>I522<br>V523                                                                                       |     |      |                                                                                |                                                                                     |                                                                                                              |                                                                       |                                                                                                                          |                                                             |                                                                                                             |                                                                                             |                                                                                       |                                                               |
| 523016 | M1 L14<br>A23<br>D25<br>A26<br>Y27<br>T28<br>H29<br>L30 T31<br>V34 F35<br>V39<br>V40<br>Y41<br>L47 L48<br>M49<br>Q51<br>K52<br>K53 F54<br>I55 K56<br>H57<br>G58<br>L59 T60<br>T61<br>A63<br>L64 S65<br>Y67<br>A68 P69<br>L70<br>M71<br>Y72 | 157 | 4173 | Hydrophobic:<br>49.68%<br>Acidic: 5.73%<br>Basic: 11.46%<br>Neutral:<br>33.12% | HEM F35<br>Y41 Y27<br><br>F137 Y27<br>HEM1 I283<br>V40 H217<br>Y41 A214<br>T218 F35 | H217<br>F137 F35<br>Y27<br><br>T218<br>V40<br>HEM1<br>A214<br>L48<br>S219<br>P282<br>I283<br>G215<br>Y41 T31 | T31 Y27<br>I283 F35<br>A210 M213<br>A214 F137<br>Y41 HEM1<br>L30 T218 | N45<br>Y27 H387<br>F35 Y41<br>HEM1<br><br>I283 Y27<br>N45 F137<br>V40 A214<br>L48 T218<br>V18 E24<br>A210 P44<br>C43 A23 | E354 Q355<br>A352 R388<br>K353 K56<br>HEM1 S351<br>F382 L59 | G36 V40<br>Y41 A214<br>H206 T32<br>M207 F35<br>T28 I283<br>T218 T31<br>V39 A210<br>Y27 F137<br>HEM1<br>H217 | F35 HEM1<br>T218 T222<br>I283 V40<br>A214 L277<br>Y41 H217<br>A281 A210<br>S219 T31<br>P282 | F137<br>Y41<br>Y27<br>H217<br><br>D134<br>T218<br>HEM1<br>F137<br>A214<br>F35<br>I283 | H217 F137<br>HEM1 F35<br>Y27 Y41<br><br>A214 T31<br>T218 I283 |

[illegible]

[illegible]

|        |                                                                                                                                                                                                                     |    |      |                                                                               |                                                                           |                                                                                                                                                  |                                                               |                                                                                                                                            |                                                                                                                                       |                                                                                                                 |                                                                                                 |                                                                                                                                          |                                                                                |
|--------|---------------------------------------------------------------------------------------------------------------------------------------------------------------------------------------------------------------------|----|------|-------------------------------------------------------------------------------|---------------------------------------------------------------------------|--------------------------------------------------------------------------------------------------------------------------------------------------|---------------------------------------------------------------|--------------------------------------------------------------------------------------------------------------------------------------------|---------------------------------------------------------------------------------------------------------------------------------------|-----------------------------------------------------------------------------------------------------------------|-------------------------------------------------------------------------------------------------|------------------------------------------------------------------------------------------------------------------------------------------|--------------------------------------------------------------------------------|
|        | A352<br>K353<br>E354<br>Q355<br>Y356<br>S357<br>G358<br>Y366<br>F368<br>G369<br>Q370<br>V371<br>S372<br>Y379<br>Q380<br>P381<br>F382<br>G383<br>A384<br>G385<br>R386<br>H387<br>R388                                |    |      |                                                                               |                                                                           |                                                                                                                                                  |                                                               |                                                                                                                                            |                                                                                                                                       |                                                                                                                 |                                                                                                 |                                                                                                                                          |                                                                                |
| 627561 | V59<br>W65<br>F66 S68<br>A69<br>Y70 S71<br>Y72<br>G73<br>T74<br>D75 P76<br>Y77<br>K78 F79<br>L80 F81<br>C83 F91<br>F93 I94<br>M95<br>F96 R98<br>K99<br>M100<br>T101<br>V102<br>L104<br>A125<br>Y126<br>L129<br>T130 | 61 | 1839 | Hydrophobic:<br>55.74%<br>Acidic: 1.64%<br>Basic: 9.84%<br>Neutral:<br>32.79% | Y126 F134<br>HEM1 F235<br><br>M526 A309<br>T317 I382<br>T525 A313<br>M312 | F235<br>Y126<br><br>P237<br>Y140<br>M526<br>F235<br>G314<br>T317<br>L129<br>M312<br>A313<br>I382<br>HEM1<br>H316<br>P381<br>T130<br>F240<br>Y386 | T317 Y126<br>H316 T130<br>F235 I382<br>L129 A313<br>HEM1 T525 | F235 H316<br><br>H316 T525<br>T317 Y386<br>S200 L129<br>E201 Q315<br>F240 M312<br>F235 Y126<br>D232 A313<br>E229 HEM1<br>I382 M526<br>I204 | H379<br><br>N522 T521<br>M378 P381<br>I527 L129<br>H379 HEM1<br>T317 A320<br>T525 L529<br>V528 W324<br>I382 F235<br>H316 M526<br>A313 | Q315<br>HEM1<br>I382 T130<br>Y140 Y126<br>I310 T317<br>P381 F235<br>A313 V139<br>G314 F134<br>S318 M526<br>L311 | F494 A313<br>G314 Y140<br>I382 F235<br>S318 T317<br>Y126 H316<br>Q498 HEM1<br>A495 M526<br>I203 | Y386<br>F240<br>F235<br>Y140<br>F134<br>Y126<br><br>V139<br>A309<br>HEM1<br>L129<br>I382<br>N524<br>H383<br>T525<br>P237<br>A313<br>T130 | Y140 F235<br>HEM1 Y126<br><br>M526 T130<br>Y140 L129<br>I385 I382<br>T317 A313 |

|        |                                                                                                                                                                                                                              |     |      |                                                                            |                                                                                        |                                                                                                      |                                             |                                                                                                                                            |                                                                                                                                       |                                                                                                                 |                                                                       |                                                                                                                 |                                                                           |
|--------|------------------------------------------------------------------------------------------------------------------------------------------------------------------------------------------------------------------------------|-----|------|----------------------------------------------------------------------------|----------------------------------------------------------------------------------------|------------------------------------------------------------------------------------------------------|---------------------------------------------|--------------------------------------------------------------------------------------------------------------------------------------------|---------------------------------------------------------------------------------------------------------------------------------------|-----------------------------------------------------------------------------------------------------------------|-----------------------------------------------------------------------|-----------------------------------------------------------------------------------------------------------------|---------------------------------------------------------------------------|
|        | Y140<br>F235<br>T236<br>P237<br>I238<br>N239<br>F240<br>L241<br>F242<br>H316<br>P381<br>I382<br>H383<br>S384<br>I385<br>Y386<br>R387<br>V418<br>A419<br>A420<br>P421<br>V423<br>N522<br>Y523<br>N524<br>T525<br>M526<br>I527 |     |      |                                                                            |                                                                                        |                                                                                                      |                                             |                                                                                                                                            |                                                                                                                                       |                                                                                                                 |                                                                       |                                                                                                                 |                                                                           |
| 629036 | A63<br>Y66<br>G67<br>M68<br>D69 P70<br>F87 L89<br>L90 R92<br>M94<br>L107<br>A116<br>A119<br>Y120<br>H122<br>L123<br>T124<br>F128<br>V132<br>V133<br>Y134                                                                     | 110 | 2123 | Hydrophobic:<br>60%<br>Acidic: 4.55%<br>Basic: 9.09%<br>Neutral:<br>26.36% | HEM1 H477<br>Y458<br><br>A474 V461<br>F472 I480<br>C479 G481<br>R478 G473<br>HEM1 K145 | A304<br>Y120<br>T124<br>S375<br>L141<br>G305<br>I373<br>A300<br>I376<br>HEM1<br>Y134<br>F128<br>V133 | F227 HEM1<br>T124 F128<br>A304 L123<br>I373 | F472 HEM1<br>Y469 W434<br><br>Y448 E437<br>F472 L367<br>Y120 R368<br>R364 V516<br>I373 P372<br>Q417 A371<br>A304 T308<br>P471 F227<br>Q470 | F227 H307<br>F128<br><br>L123 M303<br>D224 A304<br>Y134 L302<br>I373 V127<br>Y120 F232<br>Q306 F227<br>I299 T124<br>M377 Y220<br>L223 | Y120<br>L203 F227<br>S375 I376<br>Y134 F128<br>A300 Q306<br>A304 L301<br>G305 T308<br>I373<br>HEM1<br>L302 M303 | H122 F232<br>S375 M377<br>I373 Y120<br>A304 HEM1<br>I376 A119<br>T308 | Y120<br>F227<br>Y134<br>F128<br>F232<br><br>HEM1<br>A304<br>S375<br>A300<br>V133<br>Y66<br>T124<br>T308<br>I373 | HEM1 Y134<br>Y120 F227<br><br>S375 HEM1<br>A304 T308<br>T124 I373<br>I376 |

|  |                                                                                                                                                                                                                                                                                                                                                                                              |  |  |  |  |                      |  |  |  |  |  |  |  |
|--|----------------------------------------------------------------------------------------------------------------------------------------------------------------------------------------------------------------------------------------------------------------------------------------------------------------------------------------------------------------------------------------------|--|--|--|--|----------------------|--|--|--|--|--|--|--|
|  | L141<br>Q144<br>K145<br>V148<br>L152<br>F157<br>L188<br>A192<br>T195<br>A199<br>L203<br>E221<br>A222<br>L223<br>D224<br>G225<br>G226<br>F227<br>T228<br>P229<br>I230<br>N231<br>F232<br>M233<br>F234<br>M274<br>M297<br>M298<br>I299<br>A300<br>L301<br>L302<br>M303<br>A304<br>G305<br>Q306<br>H307<br>T308<br>S309<br>S310<br>A311<br>T312<br>I363<br>L367<br>H370<br>A371<br>P372<br>I373 |  |  |  |  | L301<br>T308<br>H374 |  |  |  |  |  |  |  |
|--|----------------------------------------------------------------------------------------------------------------------------------------------------------------------------------------------------------------------------------------------------------------------------------------------------------------------------------------------------------------------------------------------|--|--|--|--|----------------------|--|--|--|--|--|--|--|

|        |                                                                                                                                                                                                                                                                                                                              |     |      |                                                                               |                                                    |                                       |                                   |                                   |                                            |                          |                                     |                     |                                   |
|--------|------------------------------------------------------------------------------------------------------------------------------------------------------------------------------------------------------------------------------------------------------------------------------------------------------------------------------|-----|------|-------------------------------------------------------------------------------|----------------------------------------------------|---------------------------------------|-----------------------------------|-----------------------------------|--------------------------------------------|--------------------------|-------------------------------------|---------------------|-----------------------------------|
|        | H374<br>S375<br>I376<br>M377<br>R378<br>F408<br>V409<br>L410<br>A411<br>S412<br>P413<br>G414<br>Q417<br>E446<br>Q470<br>P471<br>F472<br>G473<br>A474<br>R476<br>H477<br>R478<br>C479<br>I480<br>G481<br>E482<br>T483<br>F484<br>A485<br>Y486<br>Q488<br>L489<br>T514<br>M515<br>V516<br>V517<br>L518<br>P519<br>L520<br>P521 |     |      |                                                                               |                                                    |                                       |                                   |                                   |                                            |                          |                                     |                     |                                   |
| 809380 | D1 P2<br>Y3 F5<br>M6 F19<br>L21<br>M22<br>M26<br>V28                                                                                                                                                                                                                                                                         | 110 | 1769 | Hydrophobic:<br>57.27%<br>Acidic: 2.73%<br>Basic: 7.27%<br>Neutral:<br>32.73% | F60 Y52 Y66<br>F160 HEM1<br>M236 A233<br>I309 T450 | Y52 F60<br>T241<br>E49 V65<br>T56 Y66 | M451 F60<br>A237 F160<br>L306 L55 | F165 F19<br>H240 Y52<br>H307 F160 | F160 F60<br>H240<br>A125 Q239<br>M310 D157 | S242 T56<br>H240<br>HEM1 | A237 L234<br>M451 HEM1<br>M236 H307 | H240<br>F160<br>Y52 | F165 HEM1<br>H240 Y52<br>Y66 F160 |

|  |                                                                                                                                                                                                                                                                                                                                                                                       |  |  |  |                                |                                                            |                                  |                                                                                 |                                                             |                                                                     |                                                                       |                                                                                                           |                                               |
|--|---------------------------------------------------------------------------------------------------------------------------------------------------------------------------------------------------------------------------------------------------------------------------------------------------------------------------------------------------------------------------------------|--|--|--|--------------------------------|------------------------------------------------------------|----------------------------------|---------------------------------------------------------------------------------|-------------------------------------------------------------|---------------------------------------------------------------------|-----------------------------------------------------------------------|-----------------------------------------------------------------------------------------------------------|-----------------------------------------------|
|  | L39<br>A48<br>A51<br>Y52<br>L55 T56<br>F60 V64<br>V65<br>Y66<br>N70<br>L73<br>M74<br>Q76<br>K77<br>V80<br>L84<br>N88<br>L89<br>Y92<br>V93 I96<br>L127<br>I128<br>T129<br>L130<br>T131<br>A132<br>S133<br>D134<br>C135<br>L136<br>Q137<br>F160<br>T161<br>P162<br>M163<br>N164<br>F165<br>V166<br>M207<br>L208<br>M230<br>M231<br>I232<br>A233<br>L234<br>L235<br>M236<br>A237<br>G238 |  |  |  | M451 A237<br>T241 H240<br>L306 | L306<br>F160<br>Y52 C68<br>HEM1<br>A237<br>T53 A48<br>M451 | T241 Y66<br>V65 T56<br>HEM1 A233 | HEM1 P2<br>L55 L21<br>A237 P162<br>F5 Y66 T161<br>F60 T450<br>M451 L306<br>Q449 | Y66 HEM1<br>A237 T241<br>L306 Y52<br>F160 M236<br>M451 I153 | A237 Y66<br>Q239 Q423<br>G238 F160<br>I128 T241<br>Y52 M451<br>F419 | F165 M310<br>S308 F160<br>Y52 T56<br>L306 L55<br>A233 G238<br>Y66 F60 | T450<br>HEM1<br>D157<br>A237<br>L306<br>T56<br>M236<br>H240<br>M451<br>L55<br>F60<br>T241<br>T161<br>Q449 | L55 A237<br>T56 L306<br>M236 F60<br>M451 T241 |
|--|---------------------------------------------------------------------------------------------------------------------------------------------------------------------------------------------------------------------------------------------------------------------------------------------------------------------------------------------------------------------------------------|--|--|--|--------------------------------|------------------------------------------------------------|----------------------------------|---------------------------------------------------------------------------------|-------------------------------------------------------------|---------------------------------------------------------------------|-----------------------------------------------------------------------|-----------------------------------------------------------------------------------------------------------|-----------------------------------------------|



[illegible]

|          |                                                                                                                                                                                                                                                                                                                                                                                      |     |      |                                                                                |                                                                                                     |                                                                                                                                              |                                                                       |                                                                       |                                                                                                                               |                                                                                                                                 |                                                                                                             |                                                                                                                                |                                                                                        |
|----------|--------------------------------------------------------------------------------------------------------------------------------------------------------------------------------------------------------------------------------------------------------------------------------------------------------------------------------------------------------------------------------------|-----|------|--------------------------------------------------------------------------------|-----------------------------------------------------------------------------------------------------|----------------------------------------------------------------------------------------------------------------------------------------------|-----------------------------------------------------------------------|-----------------------------------------------------------------------|-------------------------------------------------------------------------------------------------------------------------------|---------------------------------------------------------------------------------------------------------------------------------|-------------------------------------------------------------------------------------------------------------|--------------------------------------------------------------------------------------------------------------------------------|----------------------------------------------------------------------------------------|
|          | V453                                                                                                                                                                                                                                                                                                                                                                                 |     |      |                                                                                |                                                                                                     |                                                                                                                                              |                                                                       |                                                                       |                                                                                                                               |                                                                                                                                 |                                                                                                             |                                                                                                                                |                                                                                        |
| EAL23379 | S67 A68<br>A69<br>Y70<br>Y71<br>G72<br>E73 P75<br>F92 L94<br>M95 I99<br>L112<br>A121<br>A124<br>Y125<br>L128<br>T129<br>V132<br>F133<br>V137<br>V138<br>Y139<br>N143<br>M145<br>L146<br>M147<br>Q148<br>Q149<br>K150<br>K151<br>I153<br>G156<br>L157<br>I202<br>A206<br>S207<br>L210<br>F234<br>T235<br>P236<br>L237<br>N238<br>F239<br>M240<br>M281<br>K289<br>H303<br>I304<br>M305 | 104 | 1566 | Hydrophobic:<br>53.85%<br>Acidic: 1.92%<br>Basic: 10.58%<br>Neutral:<br>33.65% | F133 F234<br>HEM1 Y125<br><br>F234 A307<br>H314 I380<br>I523 M310<br>A311 T315<br>F133 T129<br>I383 | A378<br>H377<br>A311<br>I380<br>Y139<br>T129<br>T315<br>V138<br>A318<br>T319<br>P379<br>HEM1<br>F133<br>Y125<br>F234<br>H314<br>V524<br>L374 | T315 T129<br>HEM1 I380<br>Y139 M310<br>F133 I523<br>A311 F234<br>H314 | I523 A311<br>V138 V524<br>Y139 T235<br>HEM1 T315<br>M522 D231<br>Y125 | HEM1 Y139<br>F133<br><br>I380 A311<br>Y384 L308<br>L146 I153<br>T129 F239<br>A307 Y125<br>F234 T315<br>Q149 HEM1<br>I304 V138 | H314<br>S316 T315<br>L128 A490<br>V524 I380<br>G312<br>M310<br>Q313<br>HEM1<br>Q493 Y139<br>I523 T129<br>Y125 A311<br>P379 F234 | T315<br><br>M310 A124<br>G312 F234<br>A311 Y125<br>H314 Y384<br>V524 HEM1<br>I380 T315<br>F239 I523<br>S382 | Y125<br>Y139<br>Y384<br>F239<br>F234<br><br>T129<br>I523<br>Y125<br>L128<br>T315<br>HEM1<br>R520<br>A311<br>Y71<br>I380<br>G72 | Y125 H314<br>HEM1 F234<br><br>L128 F133<br>A311 T315<br>Y125 V524<br>M310 I380<br>I523 |

[illegible]

|          |                                                                                                                                                                                                                                                                                                                                      |     |      |                                                                               |                                                                                        |                                                                                                                                                                  |                                                                       |                                                                                                                                                                                                |                                                                                                                               |                                                                                                                      |                                                                                                                           |                                                                                                                                                  |                                                                                            |
|----------|--------------------------------------------------------------------------------------------------------------------------------------------------------------------------------------------------------------------------------------------------------------------------------------------------------------------------------------|-----|------|-------------------------------------------------------------------------------|----------------------------------------------------------------------------------------|------------------------------------------------------------------------------------------------------------------------------------------------------------------|-----------------------------------------------------------------------|------------------------------------------------------------------------------------------------------------------------------------------------------------------------------------------------|-------------------------------------------------------------------------------------------------------------------------------|----------------------------------------------------------------------------------------------------------------------|---------------------------------------------------------------------------------------------------------------------------|--------------------------------------------------------------------------------------------------------------------------------------------------|--------------------------------------------------------------------------------------------|
|          | R520<br>T521<br>M522<br>I523<br>V524<br>Q525                                                                                                                                                                                                                                                                                         |     |      |                                                                               |                                                                                        |                                                                                                                                                                  |                                                                       |                                                                                                                                                                                                |                                                                                                                               |                                                                                                                      |                                                                                                                           |                                                                                                                                                  |                                                                                            |
| KIR77383 | S73 A74<br>A75<br>Y76<br>Y77<br>G78<br>E79<br>D80 P81<br>F98<br>L100<br>M101<br>I105<br>L118<br>A127<br>A130<br>Y131<br>H133<br>L134<br>T135<br>F139<br>V143<br>V144<br>Y145<br>N149<br>M151<br>L152<br>M153<br>Q154<br>Q155<br>K156<br>K157<br>I159<br>K160<br>S161<br>G162<br>L163<br>T164<br>S167<br>L168<br>Y171<br>I208<br>I209 | 111 | 1662 | Hydrophobic:<br>50.45%<br>Acidic: 2.7%<br>Basic: 11.71%<br>Neutral:<br>35.14% | Y145 HEM1<br>Y131 F240<br>F139<br><br>V144 T135<br>Y145 T321<br>H320 A317<br>I386 M316 | Y131<br>F240<br>Y145<br><br>T136<br>F139<br>L134<br>M316<br>Y131<br>G140<br>T321<br>M528<br>A317<br>V143<br>I386<br>HEM1<br>D146<br>T135<br>A313<br>T132<br>V144 | HEM1 F139<br>Y145 F240<br>A317 L134<br>I386 M528<br>M316 T321<br>Y131 | HEM1 Y145<br>F139 F158<br><br>I310 A313<br>A317 L302<br>I386 L314<br>HEM1 I288<br>K295 M311<br>Y390 Q155<br>L152 M273<br>Y131 T321<br>I159 M528<br>F240 Q292<br>V307 V144<br>C294 L291<br>K156 | H320 F240<br>F139<br><br>F240 M528<br>HEM1 M316<br>H320 I389<br>T321 Y233<br>I209 Q319<br>I386 E234<br>Y390 D237<br>Y131 A317 | T135 S322<br>Y131 F495<br>A317 F240<br>HEM1<br>Q499 F139<br>I208 M528<br>L315 Q319<br>I386 T321<br>Y145 G318<br>H320 | HEM1 I386<br>Y131 S322<br>S388 G318<br>Y390 Y145<br>M528 A317<br>L315 A313<br>L134 F240<br>F139 Q319<br>L314 T321<br>M316 | Y145<br>Y131<br>F139<br>F245<br>Y390<br>F240<br>Y145<br><br>L134<br>Y131<br>HEM1<br>R103<br>I386<br>A317<br>T135<br>S388<br>T527<br>P242<br>M528 | Y145 HEM1<br>F240 Y131<br><br><br>A317 T321<br>F139 Y145<br>T135 I386<br>T527 P385<br>M528 |

[illegible]

[illegible]

**Table S3.** List of amino acid residues with unfavorable conformations indicated by MolProbity [cite] in modelled CYP51 structures.

| Protein ID | Residue No.                                                                                                                                     |
|------------|-------------------------------------------------------------------------------------------------------------------------------------------------|
| 00040      | 25 A, 144 V, 193 K, 194 P, 351 L, 4 P, 450 G, 530 V                                                                                             |
| 1742       | 19 K, 26 G, 138 D, 141 M, 153 C, 157 S, 158 A, 161 S, 176 P, 177 T, 213 K, 296 G, 297 E, 312 V, 374 S, 421 A, 422 A, 424 S, 474 E, 505 H, 506 R |
| 345805     | 19 S, 133 V, 179 S, 291 S, 393 S, 445 A, 446 A, 452 G, 510 P, 517 M, 520 L                                                                      |
| 367271     | 14 A, 42 I, 44 P, 133 V, 285 V, 344 P, 437 V, 446 N, 449 Y, 510 F                                                                               |
| 38441      | 56 P, 131 V, 183 P, 267 G, 268 A, 272 N, 283 G, 285 V, 344 P, 345 D, 398 E, 445 A, 454 E, 460 F, 465 K, 509 P, 513 F, 523 V                     |
| 523016     | 40 V, 84 G, 86 T, 88 A, 89 T, 151 S, 180 P, 254 T, 304 S, 351 S, 374 G                                                                          |
| 627561     | 14 G, 25 L, 49 A, 139 V, 429 K, 519 P, 524 N                                                                                                    |
| 629036     | 5 L, 6 G, 18 I, 41 K, 42 V, 133 V, 178 P, 266 G, 268 S, 341 P, 392 A, 506 G, 517 V                                                              |
| 809380     | 65 V, 111 S, 325 S, 333 S, 444 P, 446 P, 448 Y, 449 Q                                                                                           |
| EAL23379   | 7 G, 24 L, 138 V, 348 P, 363 L, 399 A, 444 G, 525 Q, 530 L                                                                                      |
| KIR77383   | 26 L, 144 V, 186 E, 187 V, 188 G, 189 I, 354 P, 407 S, 432 R, 456 M, 530 V                                                                      |

**Figure S1. Chemical structures of the ligands used in the study.**

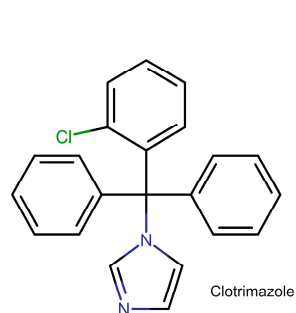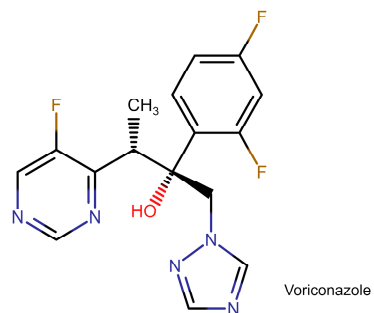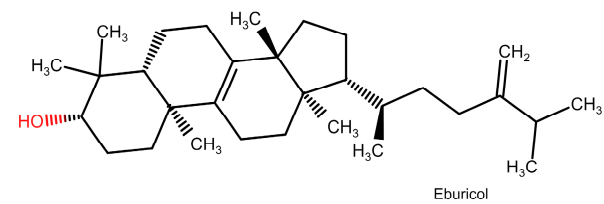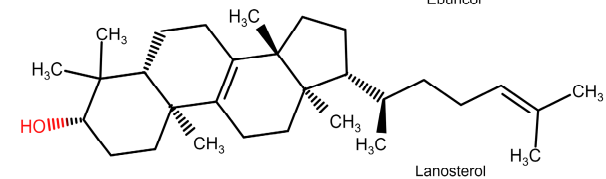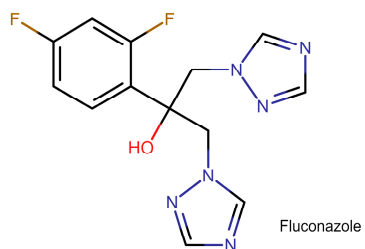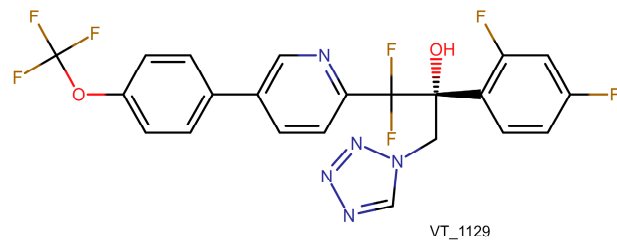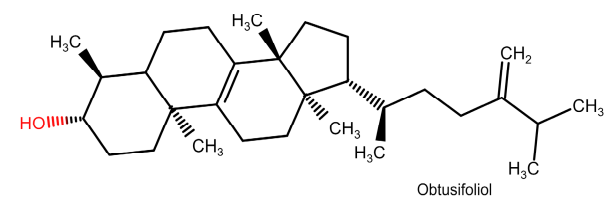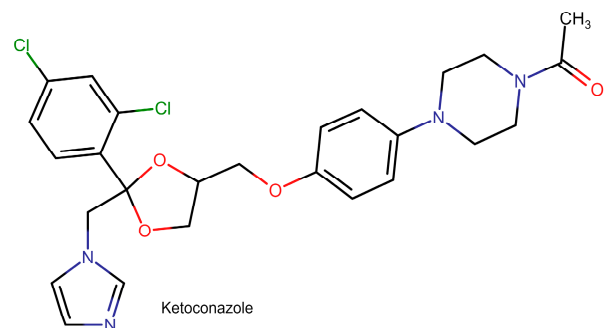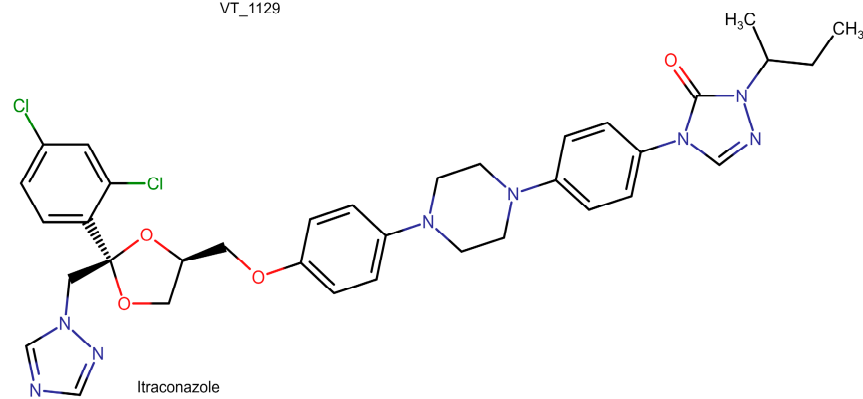



## Reference

- 1 Monk, B. C. et al. Architecture of a single membrane spanning cytochrome P450 suggests constraints that orient the catalytic domain relative to a bilayer. *Proceedings of the National Academy of Sciences* 111, 3865-3870 (2014).
