# Supplementary material for: In Silico Structural Modeling and Analysis of Interactions of Tremellomycetes Cytochrome P450 Monooxygenases CYP51s with Substrates and Azoles
Source: MDPI journal article supplement (doi:10.3390/ijms22157811), 2021-07-22
Supplement: s1 [file s1]

# ***In silico* Structural Modeling and Analysis of Interactions of *Tremellomyces* Cytochrome P450 Monooxygenases CYP51s with Substrates and Azoles**

Olufunmilayo Olukemi Akapo <sup>1,†</sup>, Joanna M. Macnar <sup>2,3,†</sup>, Justyna D. Kryś <sup>3</sup>, Puleng Rosinah Syed <sup>4</sup>, Khajamohiddin Syed <sup>1,†</sup>, Dominik Gront <sup>3,\*</sup>

<sup>1</sup> Department of Biochemistry and Microbiology, Faculty of Science and Agriculture, University of Zululand, KwaDlangezwa 3886, South Africa; akapoolufunmilayo@gmail.com (O.O.A); khajamohiddinsyed@gmail.com (K.S.)

<sup>2</sup> College of Inter-Faculty Individual Studies in Mathematics and Natural Sciences, University of Warsaw, Stefana Banacha 2C, 02-097 Warsaw, Poland; joanna.macnar@student.uw.edu.pl (J.M.M.)

<sup>3</sup> Faculty of Chemistry, Biological and Chemical Research Center, University of Warsaw, Pasteura 1, 02-093 Warsaw, Poland; juchxd@gmail.com (J.D.K); dgront@gmail.com (D.G);

<sup>4</sup> Department of Pharmaceutical Chemistry, College of Health Sciences, University of KwaZulu-Natal, Durban 4000, South Africa; prosinah@gmail.com (P.R.S.)

† Authors contributed equally to the work

\* Correspondence: khajamohiddinsyed@gmail.com (K.S.) and dgront@gmail.com (D.G.)

**Supplementary Dataset 1:** Structural alignment of *Tremellomyces* CYP51s with template 4LXJ. P450 characteristic notation for  $\alpha$ -helices and  $\beta$  strands and substrate recognition sequences (SRS) were mapped based on the template. Residues interacting with  $\geq 5$  ligands highlighted in yellow. Residues playing a role in azole drug resistance are indicated with “X”.

amphipathic helix                      transmembrane helix (TM)

41xj                      1                      10                      20                      30                      40

41xj                      . . . . . NIGLSHFLALPLAQRISLII . . . . . IIPFIYINVWQLLYSLRK  
629036                      . . . . . QSILLGFLPTLFSSFGTIGSVLLLLSLPVLVAGNVFRQKVLPRDP  
345805                      . . . . . MSSSRILSLPLEQLSWASIA . . . . . AILVLGLPALLVVGNIIIRQKVLPKDP  
809380                      . . . . . TEAQREFARNFREGKIQPIDPT . . . . . IPLYILSSIAILLFTTVVGSNLMQQLAPRDP  
627561                      . . . . . AS . VP . WAPQWLLSLPSLLVLLGIIGFPTLIIFLNVFRQLVLPDK  
38441                      . . . . . MSI . VQ . GATEAALALPLAQKLAAVFIGLPVLAIVINVLSQLLLPKDP  
1742                      . . . . . MSALPQVQQLLGQL . AQ . YIPPWFTALPTSLKIVIAVIGIPAFIIGLNVFQQLCLPRTK  
KIR77383                      . . . . . MSALPQVQQLLGQL . AQ . FIPPWFAALPTSVKVVIAVIGIPALVICLNVFQQLCLPRRK  
00040                      . . . . . QVQQLLGQL . AQ . FFPWFFAALPTSLKVAIAVVGIPALIIGLNVFQQLCLPRRK  
EAL23379                      . . . . . MAMD . PS . AVLDDWAHALPLPVKIVGAVIGVPLLIVLNLVRLIVPTDP  
271374                      . . . . . MAMD . PS . AVLDDWAHALPLPVKIVGAVIGVPLLIVLNLVRLIVPTDP  
367271                      . . . . . MAMD . PS . AVLDDWAHALPLPVKIVGAVIGVPLLIVLNLVRLIVPTDP  
523016                      . . . . . MAMD . PS . AVLDDWAHALPLPVKIVGAVIGVPLLIVLNLVRLIVPTDP

TM                      αA                      β1\_1                      β1\_2                      αB

41xj                      50                      60                      70                      80                      90                      100

41xj                      DRPPLVFYWPVWGSAAVYGMKPYEFFECCQKKYGDIFSFVLLGRVMTVYLGPKGHEFVF  
629036                      TLPPPLVFHYIPWFGSAATYGMDDPYKFLFDCREQYGDIFTFILLGRKMTVALGPKGNLIL  
345805                      SLPPVVFHLLIPWFGSAATYGMDDPYKFLFDCREQYGDIFTFVLLGRKMTVALGPKGNLIL  
809380                      . . . . . DPYKFMFGCRAKYGDLFTFILMGRMTVALGPKGNLIL  
627561                      SHPPVVLHYFPWFGSAYSIGTDPYKFLFKCRAKYGDVFTFIMFGKMTVALGPKGNLIL  
38441                      NLPPVVFHYIPWFGSAAAYGEDPYKFFYFECREKYGDVFTFVLLGRNITVALGPKGNLIL  
1742                      TLPPVVFHYIPWFGSAAAYGMDDPYKFLFDCREKYGDVFTFILLGRMTVALGPKGNLIL  
KIR77383                      DLPPVVFHYIPWFGSAAAYGEDPYKFLFECRDKYGDIFTFILMGRRTVALGPKGNLIL  
00040                      DLPPVVFHYIPWFGSAAAYGEDPYKFLFECRDKYGDIFTFILMGRRTVALGPKGNLIL  
EAL23379                      DLPPVVFHYIPWFGSAAAYGMDDPYKFLFECRDKYGDIFTFILMGRRTVALGPKGNLIL  
271374                      TAPPVVFHYIPWFGSAAAYGMDDPYKFMFECRDKYGDVFTFILLGRMTVALGPKGNLIL  
367271                      TAPPVVFHYIPWFGSAAAYGMDDPYKFMFECRDKYGDVFTFILLGRMTVALGPKGNLIL  
523016                      . . . . . MTVALGPKGNLIL

β1\_5                      αB\_1                      TT                      αC

41xj                      110                      120                      130                      140

41xj                      NAKLADVSAEEAYTHLTTPVFGKGVYIDCPNSRLMEQKKF . . . . .  
629036                      GGKLSQVSAEDAYTHLTTPVFGKGVYIDCPNEMLMQKKRM . . . . .  
345805                      GGRLNQVSAEEAYTHLTTPVFGKGVYIDCPNDLLMQKKRM . . . . .  
809380                      GGKLSQVSAEEAYTHLTTPVFGKGVYIDCPNDMLMQKKRM . . . . .  
627561                      GGKLSQVSAEDAYTHLTTPVFGKGVYIDCPNEMLMQKKF . . . . .  
38441                      GGKTSQVSAEEAYTHLTTPVFGKGVYIDCPNEMLMQKKF . . . . .  
1742                      GGKITHVSAEEAYTHLTTPVFGKGVYIDCPNDMLMQKKFSRSRVCCFCRSASGSPMPRS  
KIR77383                      GGKISQVSAEEAYTHLTTPVFGKGVYIDCPNEMLMQKKF . . . . .  
00040                      GGKISQVSAEEAYTHLTTPVFGKGVYIDCPNEMLMQKKF . . . . .  
EAL23379                      GGKISQVSAEEAYTHLTTPVFGKGVYIDCPNEMLMQKKF . . . . .  
271374                      GGKLSQVSAEDAYTHLTTPVFGKGVYIDCPNDMLMQKKF . . . . .  
367271                      GGKLSQVSAEDAYTHLTTPVFGKGVYIDCPNDMLMQKKF . . . . .  
523016                      GGKLSQVSAEDAYTHLTTPVFGKGVYIDCPNDMLMQKKF . . . . .

SRS1                      X

αD                      β3\_1

41xj                      150                      160                      170                      180                      190

41xj                      . . . . . VKGALTKEAFKSYVPLIAEEVYKYFRDSKNFRLNERTTGTIDVMVT  
629036                      . . . . . VKFGLSTENFRVYVPLIKQETLDFLGKDLKPS . NE . . WKGFNALHA  
345805                      . . . . . VKFGLSTENLRAVGMITEETLGLFTNELKASPTA . . WQGFDAALNA  
809380                      . . . . . VKFGLSTENLKSYPKITRETLDLFLSHGLHTSATK . . WQSFNALDK  
627561                      . . . . . IKHGLTPQAFQTYAPLIWQETHQFFEQEKGFN . VYPGPKSYEAIKF  
38441                      . . . . . IKHGLTALASYPPLINAECEHYFEKELGFSPTSPGPKTIEVFKI  
1742                      . . . . . IKHGLTALSSYAEALMRGETRQYFRDHVVT . . . . . GKPFVLELM  
KIR77383                      . . . . . IKHGLTALSSYAEALMRGETRQYFRDHVVT . . . . . GKPFVLELM  
00040                      . . . . . IKHGLTALSSYAEALMRGETRQYFRDHVVT . . . . . GKPFVLELM  
EAL23379                      . . . . . IKHGLTALSSYAEALMRGETRQYFRDHVVT . . . . . GKPFVLELM  
271374                      . . . . . IKHGLTALSSYAEALMRGETRQYFRDHVVT . . . . . GKPFVLELM  
367271                      . . . . . IKHGLTALSSYAEALMRGETRQYFRDHVVT . . . . . GKPFVLELM  
523016                      . . . . . IKHGLTALSSYAEALMRGETRQYFRDHVVT . . . . . GKPFVLELM

αE                      αF'                      αF                      α310F''

41xj                      200                      210                      220                      230                      240                      250

41xj                      QPMTIFTASRSLLGKEMRAKLDTFAYLYSDLDKGFPTINFVFPNLPLEHYKRDRDHAQK  
629036                      MAELTILTASATLQGGKEVRGKLDKTFKRYEALDGGFTPTINFVFPNLPPLSYKRRDKAQK  
345805                      MSELTILTASRTLQGGKEVRAGLDKTFKRYEALDGGFTPTINFVFPNLPPLSYKRRDKAQK  
809380                      LAELTILTASDCLQGGKEVRAGLDKTFKRYEALDGGFTPTMNFVFPNLPPLPAYWNRDKAQK  
627561                      FSELTILTASRTLQGGKEVRAGLTSSAAKHFEHLDKGGFTPTINFVFPNLPPLSYKRRDKAQK  
38441                      MSQILILTASRTLQGGKEVRSLDSKFAEYFHDLDGGFTPTINFVFPNLPPLSYKRRDKAQK  
1742                      MQQLILTASRTLQGGKEVRSLDSKFAEYFHDLDGGFTPTINFVFPNLPPLSYKRRDKAQK  
KIR77383                      MSELTILTASRTLQGGKEVRSLNGQFAKYEDLDGGFTPTINFVFPNLPPLSYKRRDKAQK  
00040                      MSELTILTASRTLQGGKEVRSLNGQFAKYEDLDGGFTPTINFVFPNLPPLSYKRRDKAQK  
EAL23379                      MSELTILTASRTLQGGKEVRSLNGQFAKYEDLDGGFTPTINFVFPNLPPLSYKRRDKAQK  
271374                      MAELIVLTASRTLQGGKEVRNMSIRFAKLELDKGGFTPTINFVFPNLPPLSYKRRDLAQK  
367271                      MAELIVLTASRTLQGGKEVRNMSIRFAKLELDKGGFTPTINFVFPNLPPLSYKRRDLAQK  
523016                      MSELTILTASRTLQGGKEVRSLNARFASLYEDLDGGFTPTINFVFPNLPPLSYKRRDLAQK

SRS2

SRS3

$\alpha$ G  $\alpha$ H  $\alpha$ I  
 41xj 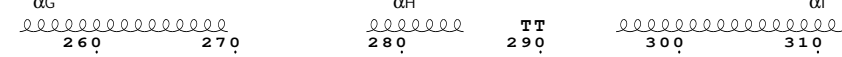  
 41xj AISGTYMSLIKERRKNNDIQ...DRDLIDSLMKNSTYKDGVKMTDQEIANLLIGVLMGGQH  
 629036 EMSEFYQSIIRGRREGGASEH...DHDMIAA.LMASTYRDGTPLSDSDIAHMMIALLMAGQH  
 345805 AMSEFYQGIIRKRREGTHDH...EYDMISA.LQSSKYKDGTPPLSDRDIAHMMIALLMAGQH  
 809380 EMSEFYQEIIRKRREGTHDH...EHDMLEA.LMGSSYKNGTPLTSDIAHMMIALLMAGQH  
 627561 AMSDFYLEIMRKRREGESDV...DEHDMIAA.LTGNEYKDGTPPLTDRDVAHMMIALLMAGQH  
 38441 SMSDFYLNIMQKRREGATDVNGSFDMLAA.LQGCYVRNGVPLTDRDIAHMMIALLMAGQH  
 1742 EMSDFYMSIIEKRRSGEHDH...ENDMIAA.LQGSVYKNGVPLSDRDISHIMIALLMAGSH  
 KIR77383 AMSDFYLKIMENRRKGESDH...EHDMIEN.LQGCKYRNGVPLSDRDVAHIMIALLMAGQH  
 00040 AMSDFYLKIMENRRKGESDH...EHDMIEN.LQSCYRNGVPLSDRDIAHIMIALLMAGQH  
 EAL23379 AMSDFYLKIMENRRKGESDH...EHDMIEN.LQSCYRNGVPLSDRDIAHIMIALLMAGQH  
 271374 EMSDFYMSIMAKRRTGEHDH...EPDMIQA.LQGSVYRNGTPLSDRDIAHMMIALTMAGQH  
 367271 EMSDFYMSIMAKRRTGEHDH...EPDMIQA.LQGSVYRNGTPLSDRDIAHMMIALTMAGQH  
 523016 EMSDFYLDIIRKRREGETEP...EHDMISV.LSGCVYRDGTPLTDRDVSHMMIALLMAGQH

$\alpha$ J  $\eta$ 1  $\alpha$ 1  $\alpha$ K  
 41xj 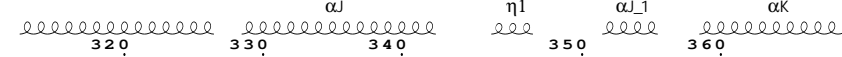  
 41xj TSAATSAWILLHLAERP DVQQELYEEQMRVL...DGGKKELTYDLLQEMPLLNQTIKETL  
 629036 TSSATSSWTLHLADRTDVYAEELYEEQKEKFGNPDGTFRDMTYEDLKDLPKLDVSVIRETL  
 345805 TSSATSSWTLHLAERTDIWEELYREQKNKFGNPDGTFRDLTYEELKELPVLHDVIRETL  
 809380 TSSATSSWTLHLAQRHDIYEALYQE QKEKFGNADGTFRDLTYEELKELPLDSCIRETL  
 627561 TSSATSSWTLHLAQKPLIFKALFEEHRLDFONEDGTWEDVTYESTKEMPLMAVIRETL  
 38441 TSSATSSWALLHLAHRPDVADALYEEQKTLFGNPDGTFRPFVEYGEDEKRM TLMNSIIRETL  
 1742 TSSATSSWFLHLAYDQELQQALYDEQVQLFGNADGTFREMTLED TRELP LMTACIRETL  
 KIR77383 TSSATSSWTLHLADRPDIYEALYQE QKEKLGNDGTFRDYKYEDLKELPIMDSIIRETL  
 00040 TSSATSSWTLHLADRPDVVEALYQE QKQLGNPDGTFRDYKYEDLKELPIMDSIIRETL  
 EAL23379 TSSATSSWTLHLADRPDVVEALYQE QKQLGNPDGTFRDYRYEDLKELPIMDSIIRETL  
 271374 TSSATSSWFLHLAHDQDIQKRLYEEQVEYFGNPDGTFRPMTYEDTKKLP LMDSCIRETL  
 367271 TSSATSSWFLHLAHDQDIQKRLYEEQVEYFGNPDGTFRPMTYEDTKKLP LMDSCIRETL  
 523016 TSSATSSWILLHLAHRPDVVEALYEEQKLFNGDGTFRREVTYESTKQMTLM EAIIRETL

$\beta$ 1\_4  $\beta$ 2\_1  $\beta$ 2\_2  $\beta$ 1\_3  $\alpha$ K\_1  
 41xj   
 41xj RMHHPLHSLFRKVMKDMHVPN...TSYVIPAGYHVLVSPGYTHLRDEYFPNAH  
 629036 RMHAP IHSIMRKVMTDMPVFNALAAAPTANEKSSYIVPKGHFVLASPGVAQMDPLIWSDAS  
 345805 RLHAP IHSIMRKVISDIPVFNLTSSPKQHENATYVIPKGHFVLASPGVAQMDPLIWQNAE  
 809380 RLHAPLH SIMRKVISDIPVFNLSPPSQTNDA SYVIPKGHFVLACPGVQMDPLIWQDST  
 627561 RMHAP IHSIYRKVLQDLEVPALAAAGGN.GSRPYVVPKGHFVVAAPGVSAMD PKVWPDAD  
 38441 RIHAP IHSIYRKVISPMPPVPA SLSAPS...ESATYIIPKNYIIVAAPGVSAMDPR IWKDAN  
 1742 RLHAP IHSIYRKVMDIAVPPSLAAPS...KDGTYVIPKGHFIVAAPGVSQMDPR IWKDAK  
 KIR77383 RMHAP IHSIYRKVLSDIPVPPSLAAPS...ENGQYIIPKGHYIMAAPGVSQMDPR I WQDAK  
 00040 RMHAP IHSIYRKVLSDIPVPPSLAAPS...ENGQYIIPKGHYIMAAPGVSQMDPR I WQDAK  
 EAL23379 RMHAP IHSIYRKVLSDIPVPPSLAAPS...ENGQYIIPKGHYIMAAPGVSQMDPR I WQDAK  
 271374 RLHAP IHSIYRKVLQPIVPPQSLAAPS...EDKAYVIPKGNFIVAAPGVSQMDPKI WDDAP  
 367271 RLHAP IHSIYRKVLQPIVPPQSLAAPS...EDKAYVIPKGNFIVAAPGVSQMDPKI WDDAP  
 523016 RLHAP IHSIYRKVLSDIPVPA SLSAPS...ESSAYVIPEGHFIVAAPGVSQMDPL I WPDAX

×

meander\_loop  $\eta$ 3  
 41xj   
 41xj QFNIRHRWNDSAS...SYS.VGEEVDYGFGAISKGVS SPYLPFGGGRHRCIGEHFA  
 629036 IWNPHRWTDEKGMASQALEEYT...SGDKVDYGYGVS VKGTESPYQPF GAGRHR CIGETFA  
 345805 EWNPHRWDD ESGVAAMAAEQYT...EGDKVDYGYGVS VKGTESPYQPF GAGRHR CIGESFA  
 809380 TWNPYRWSDERGVAQA VEEYQGEKGEKVDYGF GSVSKGTESPYQPF GAGRHR CIGESFA  
 627561 KWDPPFRWLEDKGM AQEALDSYSGATSEQIDYGF GQVSKGTESPYMPF GAGRHR CVGEQFA  
 38441 VWEPFRWSDEKGTAAAMALNEYTT.GGEKMDYGF GQVSKGTESPYQPF GAGRHR CVGEAFA  
 1742 TWRPRRWLEEGGVANAANE EYTS...GERVDYGF GAVSKGTESPYQPF GAGRHR CVGEQFA  
 KIR77383 VWNPARWHDEKGF AAAAMAQYTK...AEQVDYGF GSVSKGTESPYQPF GAGRHR CVGEQFA  
 00040 VWNPARWHDEKGF AAAAMAQYSK...AEQVDYGF GSVSKGTESPYQPF GAGRHR CVGEQFA  
 EAL23379 VWNPARWHDEKGF AAAAMVQYTK...AEQVDYGF GSVSKGTESPYQPF GAGRHR CVGEQFA  
 271374 RWNPLRWLVDGGIAKTANEQYQA...GEKVDYGF GAVSKGTESPYQPF GAGRHR CIGEQFA  
 367271 RWNPLRWLVDGGIAKTANEQYQA...GEKVDYGF GAVSKGTESPYQPF GAGRHR CIGEQFA  
 523016 TWNPYRWLDEKGVAA SAKSEQYSGATSEQVDYGF GQVSKGTESPYQPF GAGRHR.....

×

$\alpha$ L  $\beta$ 3\_3  $\beta$ 3\_2  
 41xj   
 41xj YCQLGVLMSIFIRTLKWHYPEG.KTVPPDPFTSMVLTLP TGPAKI IWEKRNPEQKIGGRHH  
 629036 YLQLQTILATFIRNVEMKLD...GPFK.TNYQTMVVLPLPGTKIL...YRNRK.....  
 345805 YVQLQTILATLCRRVVLKLE...GPPAPNYQTMIVLPLKGQTKI.MYKLRA.....  
 809380 YVQLQTIIATVVRNLT LKFE...GDFPSPNYQTMVVLPLKGGEIL...FKSRQ.....  
 627561 YLQLSVIMSYIVRN YDIQLL...GAFPPQNTYNTMIVLPLNGYVTF.KKRQSKWI.....  
 38441 YVQLSVIIAYIIRNYS LRLTEPDGLFPKNTYRTMIVLPLNGLMSL.TKRRQE.....  
 1742 YLQLTMLVSEIIRTFKVEPGAP...QFPETNYQTMIVLPLHGMIKL.EPRK.....  
 KIR77383 YTQLSTIFTYVVRNFT LKLAVP...KFPETNYRTMIVQPTNPLVTF.TLRNAEVK.....  
 00040 YTQLSTIFTYVVRNFT LKLAVP...KFPETNYRTMIVQPTNPLVTF.TLRNAEVK.....  
 EAL23379 YTQLSTIFTYVVRNFT LKLAVP...KFPETNYRTMIVQPTNPLVTF.TLRNAEVKQEV...  
 271374 YLQLTLVVGEVVRN YKLTAAQR...EFPKNTYQTMIVLPLDPKITF.EARV.....  
 367271 YLQLTLVVGEVVRN YKLTAAQR...EFPKNTYQTMIVLPLDPKITF.EARV.....  
 523016 YLQLTLVVGEVVRN YKLTAAQR...EFPKNTYQTMIVLPLDPKITF.EARV.....
